# Supplementary material
Source: Springer Nature journal article supplement (https://www.springermedizin.de/resource/supplementary/12885_2012_4027_MOESM22_ESM.pdf/9465002)

SHG-B/ SHG-F

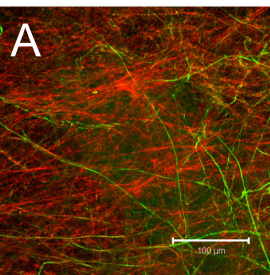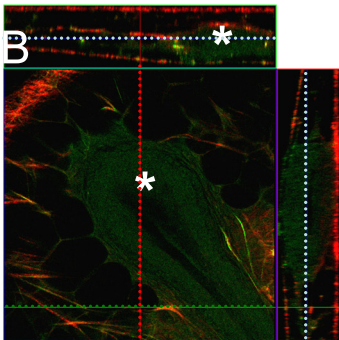

SHG-B/autofl/SHG-F

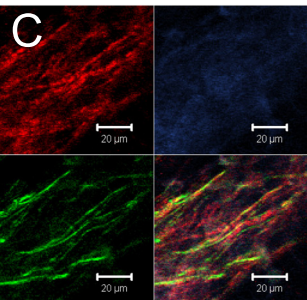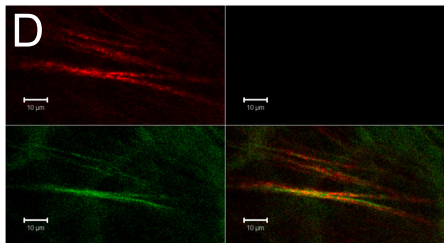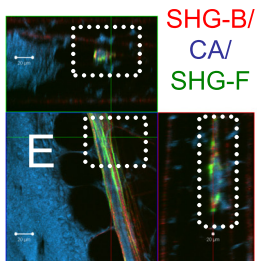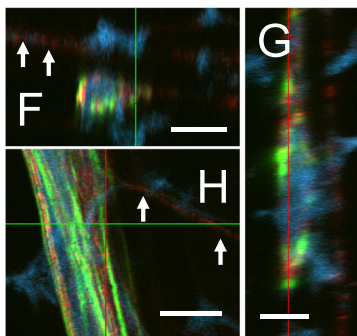

Supplement: MOESM22 [file 9465002]
